# Supplementary material
Source: PubMed Central journal article supplement (PMC9877168)
Supplement: NIHMS1853379-supplement-2.pdf [file NIHMS1853379-supplement-2.pdf]

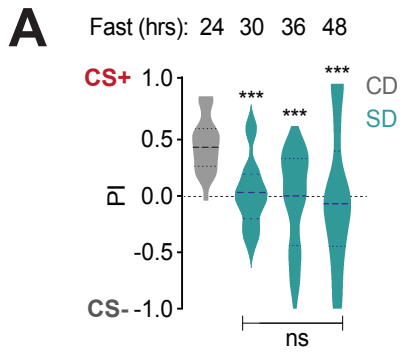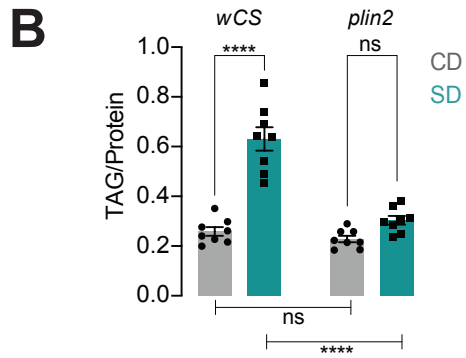

**Figure S1. Changes in food memories on a high-sugar diet occur independently of fasting time. Related to Figure 1.**

**A)** The preference index (PI) of *wCS* flies on a CD (Gray) or SD (Teal) diet under different fasting times. n=22 (30 hr SD), n=38 (36 hrs SD), n=26 (48 hrs SD), and n=20 (24 hrs CD). Kruskal-Wallis with Dunn's multiple comparison test, \*\*\* $p < 0.001$ .

**B)** Triglyceride levels normalized to protein in age-matched male *wCS* and *plin2* mutant flies on CD (gray) or SD (teal). n=8, one-way ANOVA with Tukey's test, comparisons as shown, \*\*\*\* $p < 0.0001$ .

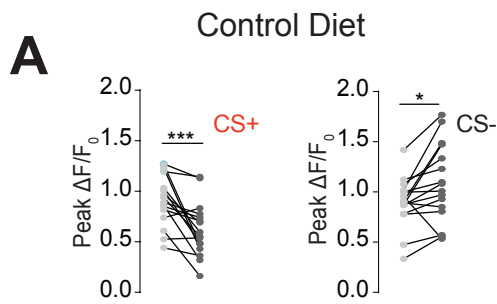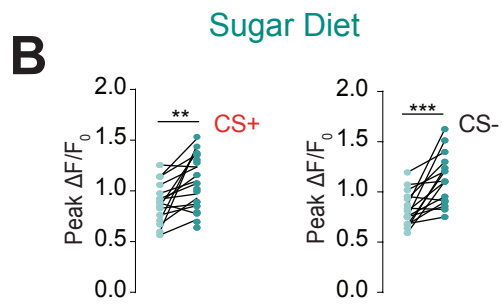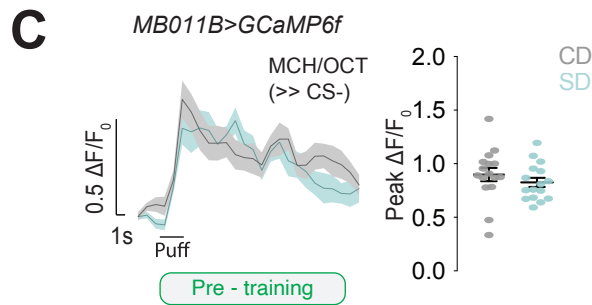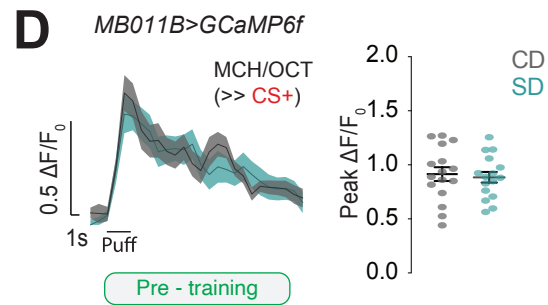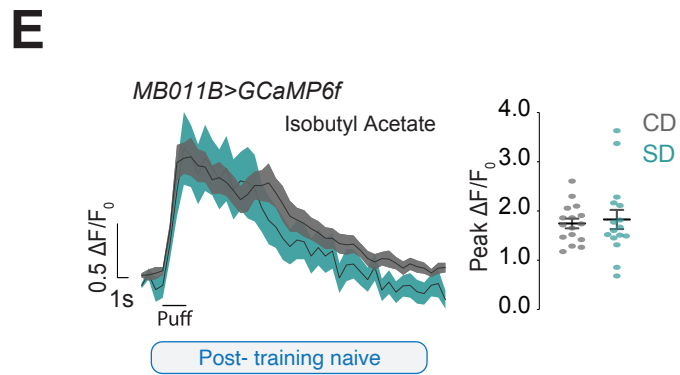

**Figure S2. A high-sugar diet alters the neural signatures of food learning. Related to Figure 2.**

**A and B)** Comparison between the peak mean  $\Delta F/F_0$  calcium responses at the  $\beta'2$  dendrites of *MB011B>GcAMP6f* neurons to an odor (MCH or OCT) before (left, lighter color) and after training (right, darker color) (indicated with CS+, CS-) of flies either on a CD (A) or an SD (B). Data are shown as mean  $\pm$  SEM. n=16; student's t-test; \* $p < 0.05$ , \*\* $p < 0.01$ , \*\*\* $p < 0.001$ .

**C-D)** The naive calcium responses to MCH and OCT (puff) in the  $\beta'2$ mp dendrites of *MB011B>GcAMP6f* neurons before training in CD (gray shades) and SD (teal shades) flies; data are shown  $\Delta F/F_0$  traces and quantified as maximum peak  $\Delta F/F_0$  response. Data correspond to that of Figures 2C and D.

**E)** The calcium responses to a novel odor (Isobutyl acetate) post-training are shown as mean  $\Delta F/F_0$  traces and quantified as maximum peak  $\Delta F/F_0$  in CD (gray) and SD flies (teal). n=16; Student's t-test.

Data are shown as  $\pm$  SEM.

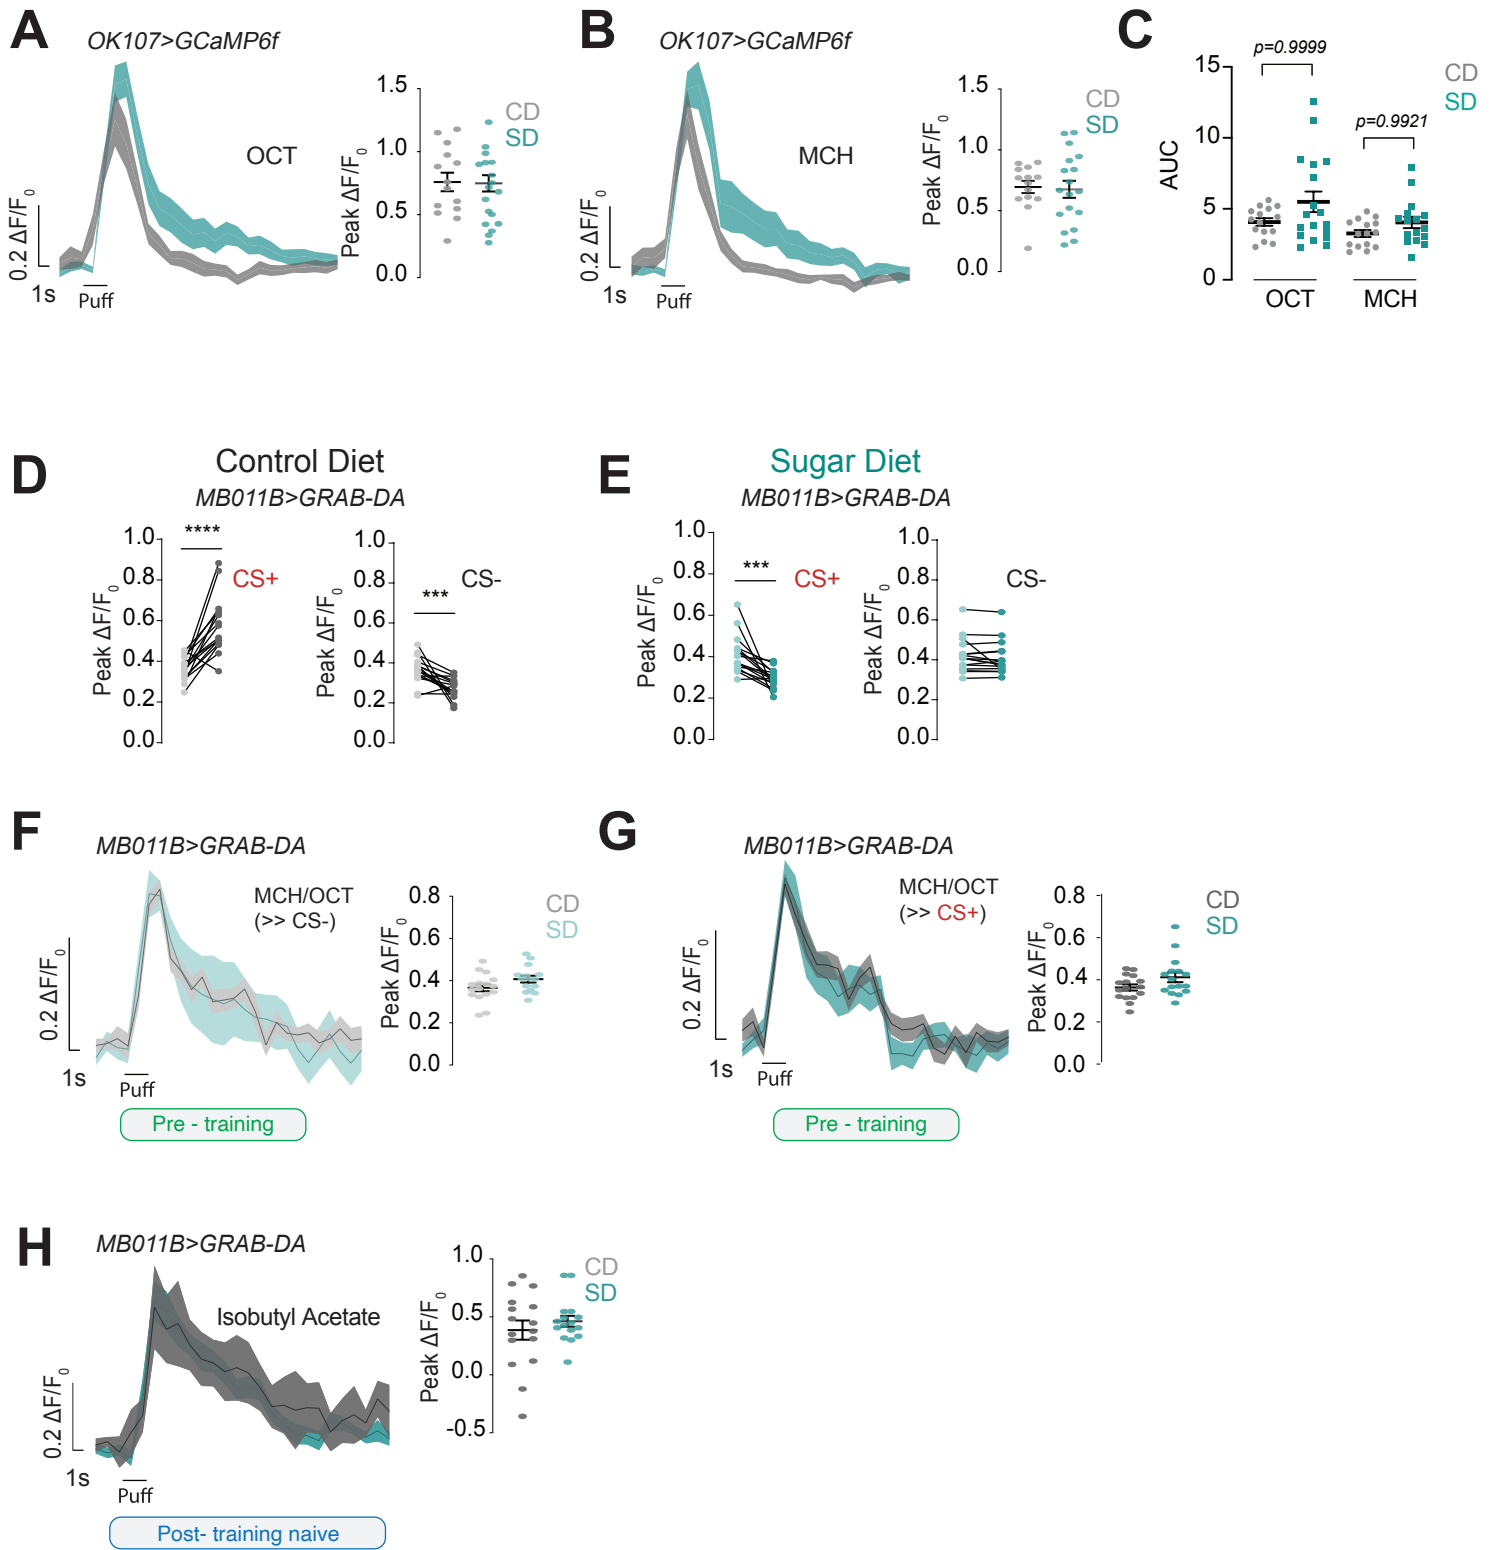

**Figure S3. Diet-dependent changes in DA-induced plasticity during learning. Related to Figure 3.**

**A-C)** The calcium responses to OCT (A) and MCH (B) (puff) in the  $\beta'2$  axons of Kenyon Cells of naive *OK107>GCaMP6f* flies fed a CD (gray) or SD (teal) shown as mean  $\Delta F/F_0$  traces and quantified as maximum peak  $\Delta F/F_0$  response (A and B) or area under the curve (C). n=14-18, A) Student's t-test, B) Mann-Whitney Test, C) One-way ANOVA Kruskal Wallis test.

**D-E)** Comparison between the peak mean  $\Delta F/F_0$  calcium responses at the  $\beta'2$  dendrites of *MB011B>GRAB-DA* neurons to a naïve odor (MCH or OCT) before (left, lighter color) and after training (right, darker color) (indicated with CS+, CS-) of flies either on CD (D) or SD (E). Data are shown as mean +/- SEM. n=16; student's t-test and Wilcoxon test (SD CS-). \*\*\* $p < 0.001$ , \*\*\*\* $p < 0.0001$ .

**F-G)** The mean  $\Delta F/F_0$  traces and quantification of maximum peak  $\Delta F/F_0$  response to CS- (F) and CS+ (G) pretraining in the  $\beta'2$  dendrites of CD (gray) and SD (teal) *MB011B>GRAB-DA* flies before training. Data correspond to Figure 3C and Figure 3D. n=16; Student's t-test.

**H)** The calcium responses to a novel odor (Isobutyl acetate) post-training shown as mean  $\Delta F/F_0$  traces and quantified as maximum peak  $\Delta F/F_0$  in CD (gray) and SD flies (teal). n=16; Student's t-test.

Data are shown as mean +/- SEM.

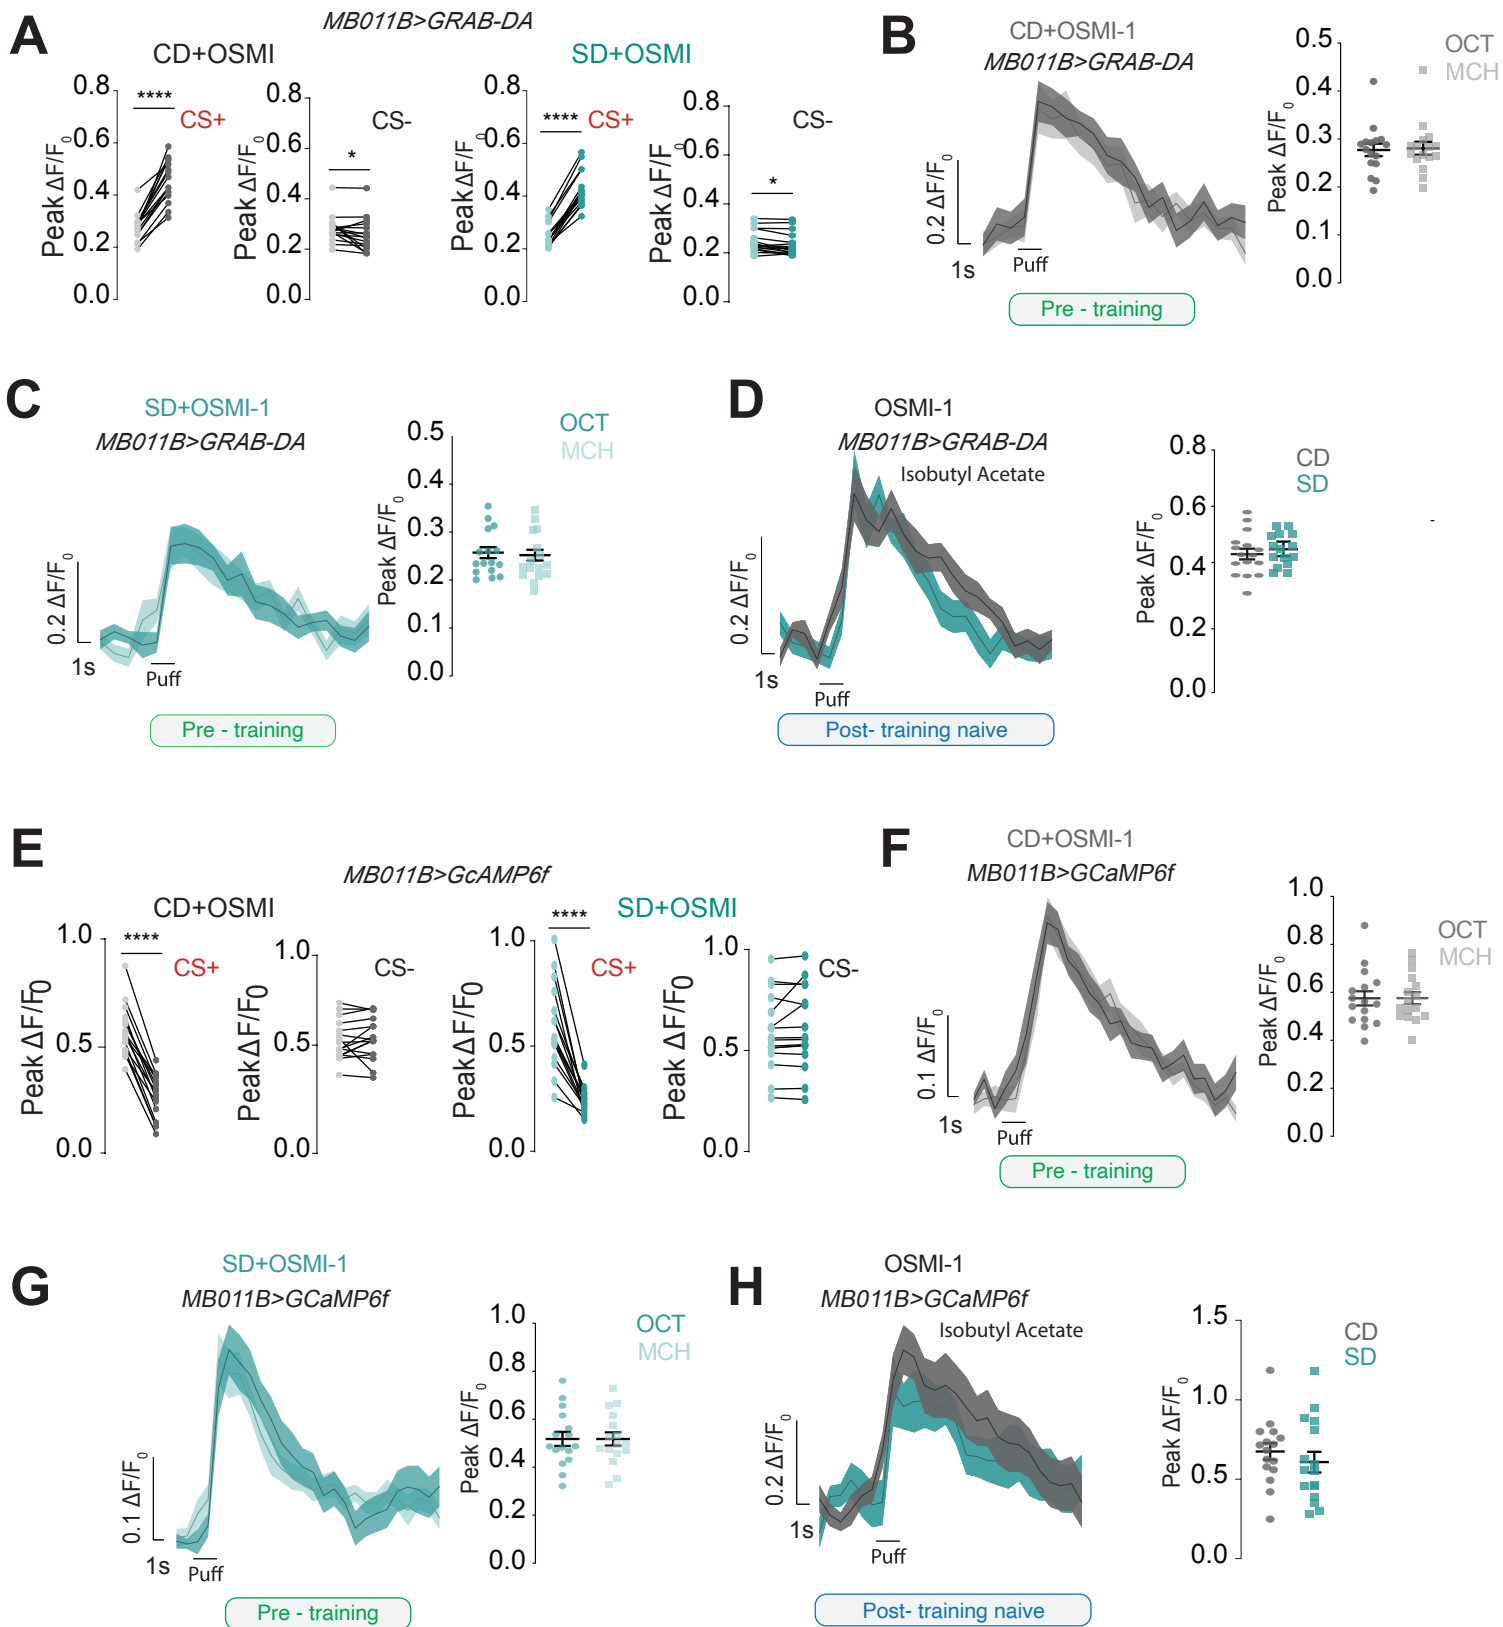

**Figure S4. Effects of OGT inhibition on DA-plasticity and MBON activity. Related to Figure 4.**

**A)** Comparison between the peak mean  $\Delta F/F_0$  calcium responses at the  $\beta'2$  dendrites of *MB011B>GRAB-DA* neurons to a naïve odor (MCH or OCT) before (left, lighter color) and after training (right, darker color) (indicated with CS+, CS-) of flies either on a CD (gray) or an SD (teal) + OSMI. n = 16; student's t-test (CD CS+) and Wilcoxon test (CD CS-, SD CS+ and CS-); \* $p < 0.05$ , \*\*\*\* $p < 0.0001$ .

**B-D)** The mean  $\Delta F/F_0$  traces and quantification of maximum peak  $\Delta F/F_0$  response to MCH and OCT pretraining (B-C) or to a novel odor post-training (D) in the  $\beta'2$  dendrites of CD+OSMI-1 (B, gray, Mann-Whitney), SD+OSMI-1 (C, teal, Mann-Whitney), and CD vs. SD both with OSMI-1 (D, Student's t-test) in *MB011B>GRAB-DA* flies. n=16 flies,

**E)** Comparison between the peak mean  $\Delta F/F_0$  calcium responses at the  $\beta'2$  dendrites of *MB011B>GcAMP6f* neurons to a naïve odor (MCH or OCT) before (left, lighter color) and after training (right, darker color) (indicated with CS+, CS-) of flies either on a CD (gray) or an SD (teal) + OSMI. n = 16; student's t-test; \*\*\*\* $p < 0.0001$ .

**F-H)** The mean  $\Delta F/F_0$  traces and quantification of maximum peak  $\Delta F/F_0$  response to MCH and OCT pretraining (F, G) or to a novel odor post-training (H) in the  $\beta'2$  dendrites of CD+OSMI-1 (F, gray, Student's t-test), SD+OSMI-1 (G, teal, Student's t-test), and CD vs. SD both with OSMI-1 (H, Student's t-test) in *MB011B>GCaMP6f* flies. n=16 flies.

Data are shown as mean +/- SEM.



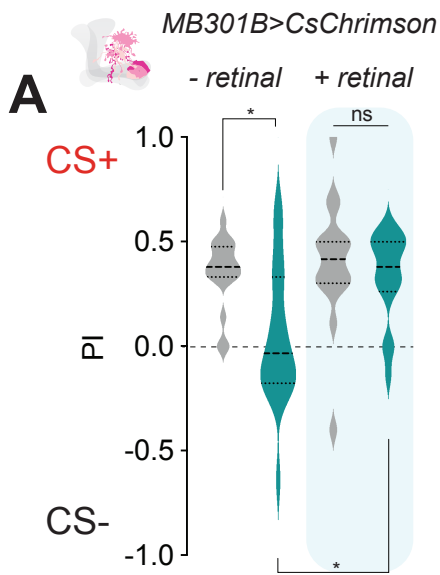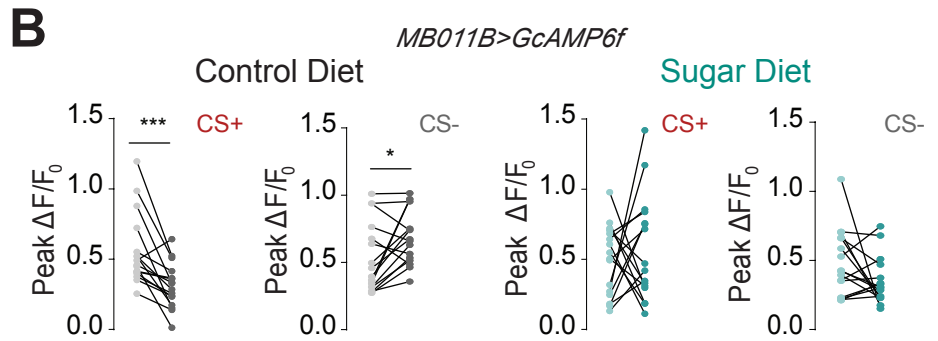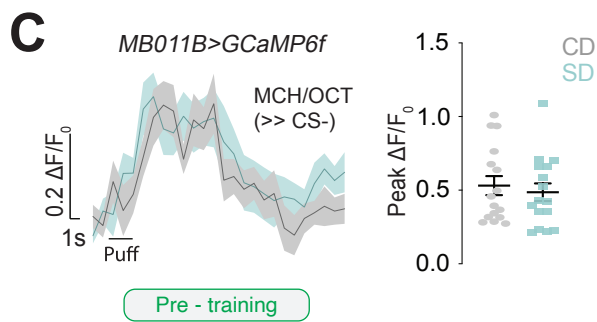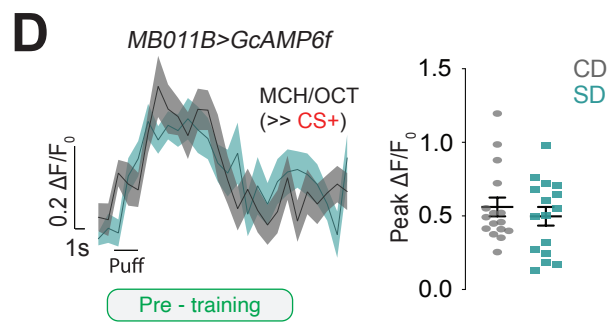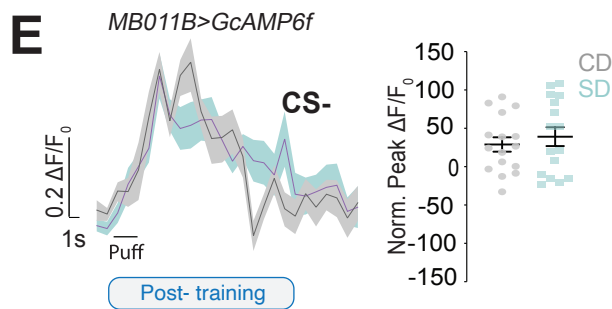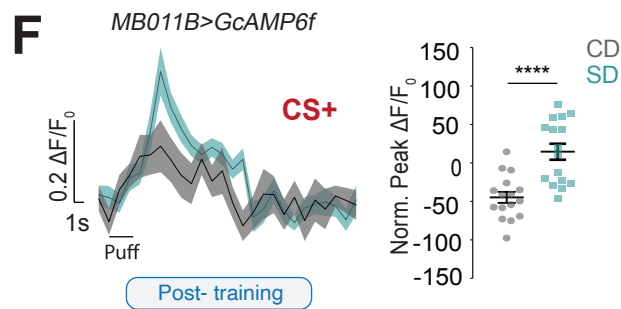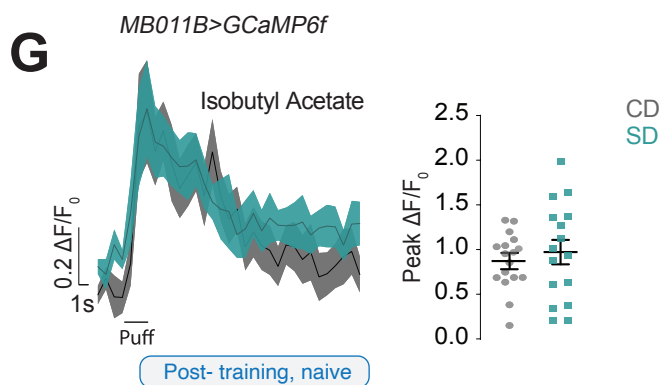

**Figure S5. The effect of diet on the presynaptic responses of MBONs to cues. Related to Figure 5.**

**A)** The preference index (PI) to the CS- (water) or CS+ (sucrose + light) of *MB301B>CsChrimson* flies on a CD (Gray) or SD (Teal) with or without retinal. n=16-18.

Kruskal-Wallis test, \* $p < 0.05$ .

**B)** Comparison between the peak mean  $\Delta F/F_0$  presynaptic calcium responses of *MB011B>GcAMP6f* neurons to a naïve odor (MCH or OCT) before (left, lighter color) and after training (right, darker color) (indicated with CS+, CS-) of flies either on a CD (gray) or an SD (teal). n=16; Wilcoxon test (CD CS- and CS+, SD CS-) and student's t-test (SD CS+); \*  $p < 0.05$ , \*\*\* $p < 0.001$ .

**C-D)** The pre-training mean calcium  $\Delta F/F_0$  traces and quantification of maximum peak  $\Delta F/F_0$  response to CS- and CS+ in the axons of CD (gray) and SD (teal) in *MB011B>GCaMP6f* flies. n=16 flies, Mann-Whitney test.

**E-G)** The post-training mean calcium  $\Delta F/F_0$  traces and quantification of maximum peak  $\Delta F/F_0$  response to CS- (E, Mann-Whitney) and CS+ (F, Student's t-test), or to a novel odor post-training (G, Student's t-test) in the axons of CD (gray), and SD (teal) *MB011B>GCaMP6f* flies. Data corresponds to that in Figure 5C' and Figure 5D'. n=16.

Data are shown as +/- SEM.

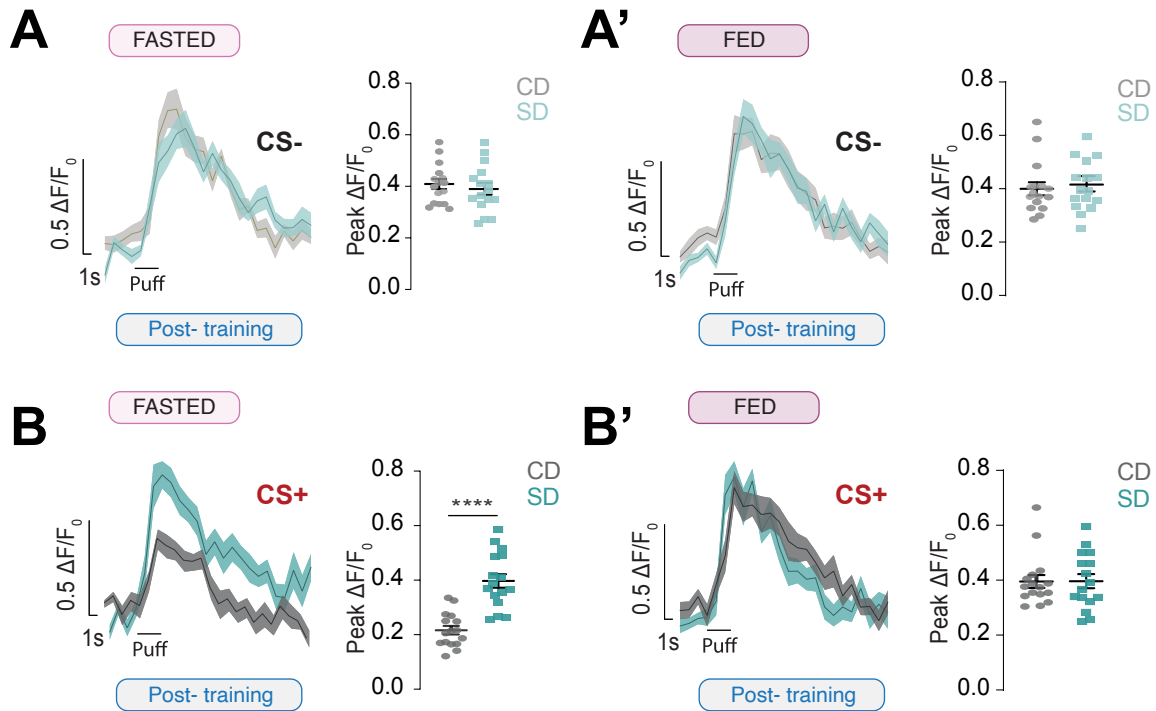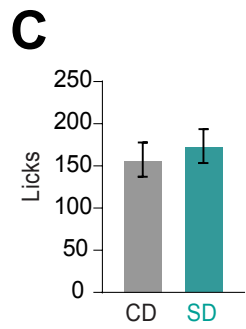

**Figure S6. The presynaptic responses of MBONs to cues change during eating. Related to Figure 6.**

**A-B')** The presynaptic calcium responses to the CS- (A, A') and CS+ (B, B') in *MB011B>GCaMP6f* CD (gray) and SD (teal) flies after appetitive conditioning in fasted (A and B, fasted) or refed flies (A' and B'). Data from Figure 6B and Figure 6C. n=16. A) Student's t-test, A') Mann-Whitney test, B) Student's t-test, \*\*\*\* $p < 0.0001$ , B') Mann-Whitney test.

**C)** The number of food interactions (licks) for flies feeding on 2M sucrose during a 30 min period; CD (gray) and SD (teal). n=16-24; Student's t-test.

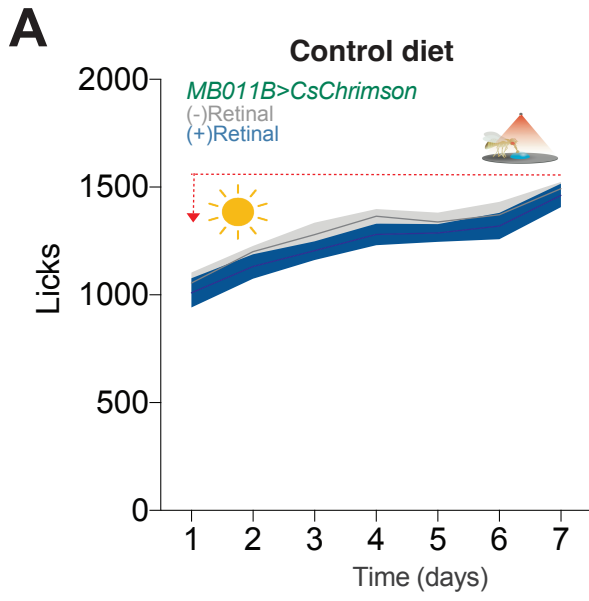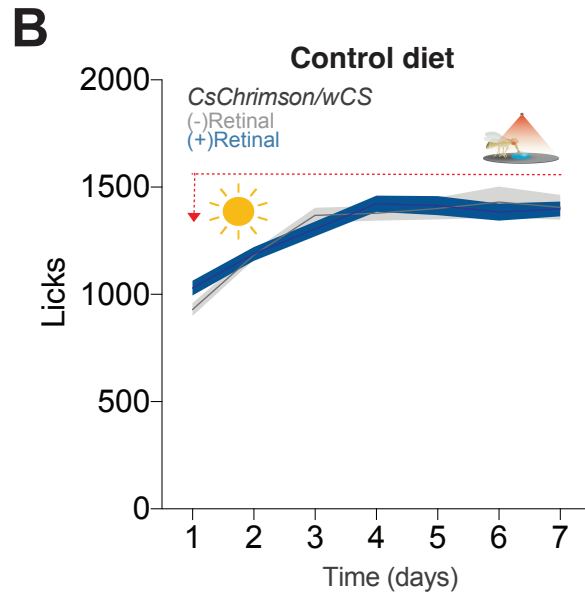

**Figure S7. The activity of MB011B+ MBONs affects eating and energy balance. Related to Figure 7.**

**A)** The number of food interactions (licks) per day on a control diet in experimental *MB011B>CSChrimson* +retinal (blue) flies or control *MB011B>CSChrimson* - retinal (gray) flies. n=26 flies, Two-way Repeated Measure ANOVA with Sidak's test,  $p>0.05$ . **B)** The number of food interactions (licks) per day on a high sugar diet in control *CSChrimson>wCS* + retinal (blue) or - retinal (gray) flies. n=26 flies, Two-way Repeated Measure ANOVA with Sidak's test,  $p>0.05$ .

Data are shown as +/- SEM.
